# Supplementary material for: Armored polymyxin B: a nanosystem for combating multidrug-resistant Gram-negative bacilli
Source: PubMed Central journal article supplement — RSC Adv. 2024 Dec 17;14(53):39700–7. doi: 10.1039/d4ra07577c (PMC11650604; doi:10.1039/d4ra07577c), 2024-12-17
Supplement: RA-014-D4RA07577C-s001.pdf [file RA-014-D4RA07577C-s001.pdf]

## **Armored Polymyxin B: A Nanosystem for Combating Multidrug-Resistant Gram-Negative Bacteria**

Jianling Huang,<sup>\*a</sup> Xiuwen Hong,<sup>b</sup> YunxiangLv,<sup>a</sup> Yueyue Wang,<sup>a</sup> Kexing Han,<sup>a</sup> Chenghua Zhu,<sup>\*c</sup> and Lixu Xie<sup>\*d</sup>

<sup>a</sup> *Department of Pulmonary and Critical Care Medicine, The First Affiliated Hospital of Bengbu Medical University, Anhui Clinical and Preclinical Key Laboratory of Respiratory Disease; Molecular Diagnosis Center, Bengbu, Anhui, 233000, China*

<sup>b</sup> *Department of Pulmonary and Critical Care Medicine, The Second Affiliated Hospital of Nanjing Medical University, Nanjing, Jiangsu 210011, China*

<sup>c</sup> *Nanjing Pukou Hospital of TCM, Pukou Hospital of Chinese Medicine affiliated to China Pharmaceutical University, Nanjing 210000, China*

<sup>d</sup> *Department of Pulmonary and Critical Care Medicine, Qilu Hospital of Shandong University, Wenhua xi Road 107#, Jinan 250012, China*

\*Correspondence author

E-mail addresses: huang021706@163.com (J.Huang), hxw982333@163.com (X. Hong), 13275527010@163.com (Y. Wang), yunxianglv@126.com (Y. Lv), hankexing0329@163.com (K.Han), zhuchenghuacheng@163.com (C. Zhu), lixu\_xie@163.com (L. Xie).

## 1. Supplementary Figures

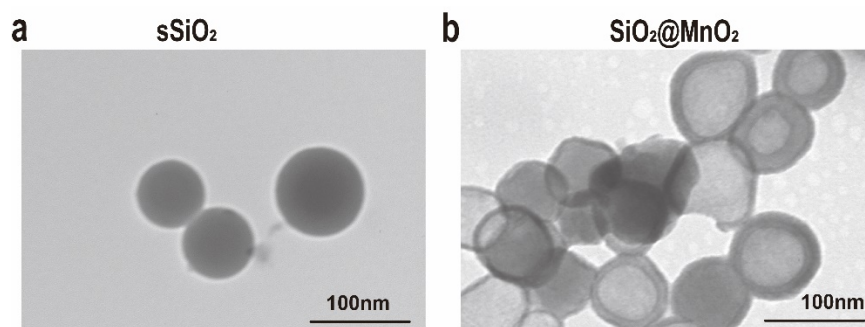

Fig. S1. TEM images of sSiO<sub>2</sub>(a) and SiO<sub>2</sub>@MnO<sub>2</sub>(b). Scale bar: 100 nm.

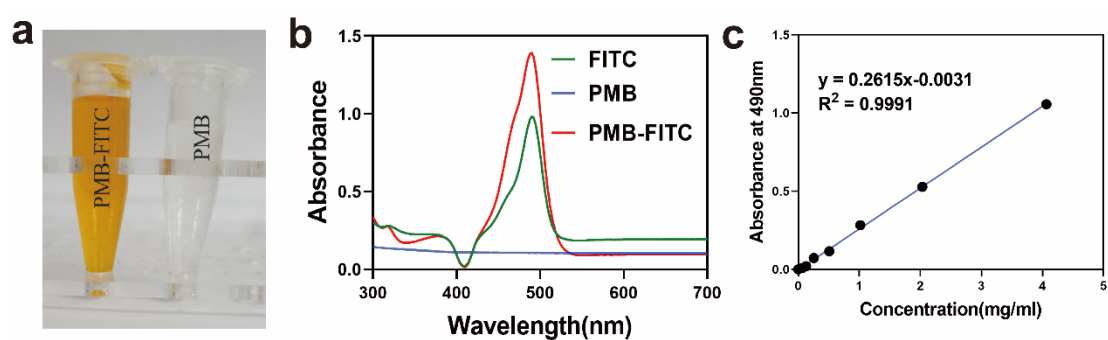

Fig. S2. (a) Photograph of PMB and PMB-FITC in water. (b) UV-vis absorption of FITC, PMB and PMB-FITC. (c) standard curve of PMB-FITC with different concentrations.

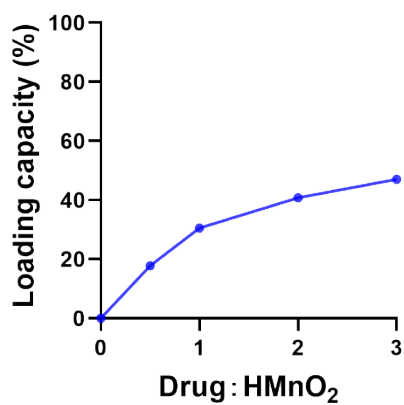

Fig. S3. PMB loading capacity of HMnO<sub>2</sub> at various ratios of drug: HMnO<sub>2</sub>. Data are presented as the mean  $\pm$  SD (n = 3).

## 2. Supplementary Table

**Table S1. The drug sensitivity of *Pseudomonas aeruginosa***

| Antibiotics             | MIC ( $\mu\text{g mL}^{-1}$ ) | Sensitivity |
|-------------------------|-------------------------------|-------------|
| Levofloxacin            | $\geq 8$                      | R           |
| Ciprofloxacin           | 1                             | S           |
| polymyxin               | 1                             | I           |
| Tobramycin              | $\leq 1$                      | S           |
| Amikacin                | $\geq 64$                     | R           |
| Meropenem               | $\leq 0.25$                   | S           |
| Imipenem                | 1                             | S           |
| Aztreonam               | 4                             | S           |
| Cefepime                | $\geq 16$                     | R           |
| Ceftazidime             | $\geq 16$                     | R           |
| Piperacillin/tazobactam | $\geq 16$                     | R           |
| Doxycycline             | $\geq 64$                     | R           |
| Cefoperazone/Sulbactam  | $\geq 8$                      | R           |
| Ticarcillin/clavulanate | 32                            | I           |

Note.S : Sensitive, I : Intermediate, R : Resistant.
